# Supplementary material for: Lipids in Psychiatric Disorders: Functional and Potential Diagnostic Role as Blood Biomarkers
Source: MDPI journal article supplement (doi:10.3390/metabo14020080), 2024-01-23
Supplement: s1 [file s1]

Supplementary Materials

**Table S1.** Studies assessing blood lipid alterations in psychiatric disorders at the level of individual lipid species.

|      | Study           | Disease | Medication Status                   | Sample Size       | Lipid Classes                 | Main Findings                                                                                                                                                                                                                                                                                                                                                                                                                                                                       |
|------|-----------------|---------|-------------------------------------|-------------------|-------------------------------|-------------------------------------------------------------------------------------------------------------------------------------------------------------------------------------------------------------------------------------------------------------------------------------------------------------------------------------------------------------------------------------------------------------------------------------------------------------------------------------|
| [91] | Li 2022         | SCZ     | medicated                           | SCZ=44, CTL=35    | SCFAs                         | Higher levels of total SCFAs, acetic acid, acetic acid/ propionic acid ratio SCZ compared to CTL. The lipid levels were positively associated with acetic acid/ propionic acid ratio.                                                                                                                                                                                                                                                                                               |
| [41] | Tkachev 2021    | SCZ     | pre- and post- treatment            | SCZ=92            | 322 different lipids          | 20 triglyceride species increased in individuals with the least improvement in PANSS scores, but not in those with the largest reduction in PANSS scores.                                                                                                                                                                                                                                                                                                                           |
| [40] | Liu 2021        | SCZ     | medicated                           | SCZ=76, CTL=50.   | LPE, PE, PC, LPC, PUFAs       | LPEs (LPE 16:1 sn1, LPE 16:1 sn2, and LPE 22:5 sn2) and LPC 16:0 sn2 were higher, CAR (8:1, 10:1, 10:2) and PUFA 16:2, 18:2, 18:3, 20:4, 22:6) were lower in SCZ drug-naïve patients. Lithocholic acid were lower in SCZ patients. PE (O-34:3) and the PE (O-36:6) decreased, but the PE 34:2 increased.                                                                                                                                                                            |
| [52] | Nandeeshha 2023 | SCZ     | medicated                           | SCZ=200, CTL=169. | TC, TG, HDL, LDL, VLDL        | TG increased and HDL-C was reduced in SCZ. TC and TG was negatively correlated with cognitive score.                                                                                                                                                                                                                                                                                                                                                                                |
| [50] | Song 2023       | SCZ     | pre- and post- treatment vs control | SCZ=43, CTL=29    | PC,PE, C16 Sphinganine, PUFAs | Lower levels of LysoPC, PC, PE, C16 sphinganine, sulfate, glycocholic acid, taurocholic acid, stearic acid, behenic acid, $\alpha$ -dimorphecolic, Calcifediol, L- hydroxyproline in SCZ compared to CTL. After medication with risperidone or olanzapine, the levels of LysoPC, PC, PE, C16 sphinganine and adrenic acid were significantly increased, while linoleic acid, oleic acid, palmitoleic acid, $\gamma$ -linolenic acid, oxoglutaric acid were significantly decreased. |

|       |               |     |                                     |                                                                                            |                                                 |                                                                                                                                                                                                                                                                                                                                                                                                                                |
|-------|---------------|-----|-------------------------------------|--------------------------------------------------------------------------------------------|-------------------------------------------------|--------------------------------------------------------------------------------------------------------------------------------------------------------------------------------------------------------------------------------------------------------------------------------------------------------------------------------------------------------------------------------------------------------------------------------|
| [55]  | Guidara 2022  | SCZ | medicated                           | SCZ=40, CTL=40                                                                             | oxysterols                                      | The ratios of cholestane-3 $\beta$ ,5 $\alpha$ ,6 $\beta$ -triol, 27-hydroxycholesterol (27-OHC) and Cholesterol to Tchol increased SCZ compared to CTL. For the SCZ patients, the plasma 24- hydroxycholesterol levels were positively correlated with PANSS but negatively correlated with the MoCA. The ratio Cholesterol to Tchol was negatively correlated with MOCA scores and positively correlated with PANSS general. |
| [34]  | Wang 2022     | SCZ | medicated                           | SCZ=31, CTL=32                                                                             | 30 lipid classes and 782 lipid species          | Levels of acylcarnitine and PE were lower, whereas those of LPC, LPE, LPI, PIP, and PIP2 were higher in the SCZ compared to CTL                                                                                                                                                                                                                                                                                                |
| [44]  | Costa 2023    | SCZ | medicated                           | SCZ=30, CTL=30                                                                             | LPC, LPS, LPE, CE, Cer, CAR, SM, PE, TG, PC, PS | Increased: LPS 21:0, LPC18:1, CAR 10:2<br>Decreased: CE 16:1, SM 12 types, Cer 44:1, PE 40:7, TG 51:7, 53:7, 54:7, PC 46:7, PS 43:2                                                                                                                                                                                                                                                                                            |
| [31]  | Li 2022       | SCZ | medicated                           | SCZ=80, CTL=40                                                                             | 812 different lipids                            | 244 lipids were significantly reduced (22 types of CER, 25 LPC, 12 LPE, 50 PC, 103 PE, 6PI, 10 PS, 13 SM), and 143 increased (20 types of CER, 32 TG, 4 DG, 3 LPC, 3 LPE, 17PC, 35 PE, 7PI, 13 PS, 5 SM)                                                                                                                                                                                                                       |
| [47]  | Frajerma 2023 | SCZ | medicated one-year follow-up        | 32 converters (C) and 29 non-converters (NC) persons at ultra-high risk of psychosis (UHR) | Fatty acids, phospholipids and sterols          | Among UHR individuals, elevated baseline membrane linoleic acid level was associated with conversion to psychosis. Combining sterols, fatty acids, and membrane composition improved the prediction of psychosis onset.                                                                                                                                                                                                        |
| [56]  | Zhang 2023    | SCZ | medicated                           | SCZ=105, CTL=105                                                                           | TC                                              | TC levels were positively associated with RBANS subscale scores of immediate memory and language.                                                                                                                                                                                                                                                                                                                              |
| [95]  | Cao 2019      | SCZ | pre- and post- treatment vs control | SCZ=225, CTL=175                                                                           | CAR                                             | Medium and high chain CAR decreased in pre-treatment SCZ compared to CTL, even lower post-treatment SCZ.                                                                                                                                                                                                                                                                                                                       |
| [106] | Wood 2015     | SCZ | medicated                           | SCZ=23, CTL=27                                                                             | LPE-P, LPC-P, PE-P, PC-P                        | PE-P, PC-P decreased in SCZ compared to CTL                                                                                                                                                                                                                                                                                                                                                                                    |

|       |                     |     |                                                       |                                                     |                                                               |                                                                                                                                                                                       |
|-------|---------------------|-----|-------------------------------------------------------|-----------------------------------------------------|---------------------------------------------------------------|---------------------------------------------------------------------------------------------------------------------------------------------------------------------------------------|
| [94]  | Kriisa 2017         | SCZ | pre- and post- treatment vs control                   | SCZ=38, CTL=37                                      | CAR                                                           | Long-chain CAR increased in FEP compared to CTL; short-chain CAR decreased in FEP compared to CTL; CAR decreased in FEP after medication                                              |
| [107] | Leppik 2020         | SCZ | pre- and post- treatment vs control                   | SCZ=38, CTL=37                                      | PC, PC-O, SM                                                  | PC, PC-O reduced in FEP compared to CTL; no difference in medicated SCZ and CTL                                                                                                       |
| [42]  | Yan 2018            | SCZ | pre- treatment vs control and pre- vs post- treatment | SCZ=20, CTL=29                                      | 445 lipids belonging to 17 lipid TG, CE, LPC, PC-P, PE-P, CAR | TG, CE increased in FEP compared to CTL; LPC, PC-P, PE-P decreased in FEP compared to CTL; CAR 18:2 decreased in FEP compared to CTL                                                  |
| [46]  | Wang 2019           | SCZ | medicated and non-medicated                           | SCZ=119 (28 FEP), CTL=109                           | PC, PE, LPC, LPE, SM, PC-O, PE-O                              | LPC, PC-O, PE-O decreased in SCZ compared to CTL; SM increased in SCZ compared to CTL; PC both increased and decreased depending on lipid species; no difference FEP vs recurrent SCZ |
| [92]  | Cao 2020            | SCZ | recently non-medicated (1 month)                      | SCZ=113, CTL=111                                    | Car, LPC, LPC-O                                               | LPC decreased in SCZ vs CTL; CAR increased 10:1, 18:1, 16:0                                                                                                                           |
| [108] | He 2012             | SCZ | medicated and non-medicated                           | SCZ=216, CTL=265                                    | PC-O 38:6                                                     | PC-O 38:6 decreased in SCZ compared to CTL                                                                                                                                            |
| [43]  | Orešič 2012         | SCZ | medicated                                             | SCZ=19, CTL=53; twins                               | LPC, PC, PE, PG, PS, PA, Cer, MAG, DAG, TAG                   | Twin study. TG increased in SCZ compared to CTL; LPC lipid species decreased in SCZ compared to CTL. difference between SCZ and CTL not included in table form                        |
| [53]  | McEvoy 2013         | SCZ | medicated and non-medicated                           | SCZ=20, FEP=20, CTL=29                              | PC, PE                                                        | Decreased PUFA-containing PC and PE lipid species in SCZ compared to CTL. Lipid species containing particular fatty acids, no bulk structure                                          |
| [116] | Solberg 2016        | SCZ | medicated                                             | SCZ=55                                              | TG, membrane PUFAs (blood cells)                              | Increased TG in SCZ compared to CTL. No individual TG species; esterified membrane (blood cells) PUFAs                                                                                |
| [54]  | Kaddurah-Daouk 2012 | SCZ | recently non-medicated and drug naïve                 | SCZ=20+20 (naive and recently un-medicated), CTL=17 | PC-P, PE-P                                                    | PC-P, PE-P decreased in both drug-naïve and medicated SCZ compared to CTL; lipid species containing particular fatty acids, no bulk structure                                         |

|       |              |     |                                                                                                                                                                                |                                 |                                                                                                                                                                                                                                                 |                                                                                                                                                                                                                                                                                                                                                                                                                                                                                                                                                                                                                      |
|-------|--------------|-----|--------------------------------------------------------------------------------------------------------------------------------------------------------------------------------|---------------------------------|-------------------------------------------------------------------------------------------------------------------------------------------------------------------------------------------------------------------------------------------------|----------------------------------------------------------------------------------------------------------------------------------------------------------------------------------------------------------------------------------------------------------------------------------------------------------------------------------------------------------------------------------------------------------------------------------------------------------------------------------------------------------------------------------------------------------------------------------------------------------------------|
| [45]  | Wang 2021    | SCZ | 28 patients drug-naïve, the other patients have recurrent schizophrenia (91) who had not taken any antipsychotic drugs that may modify lipid metabolism for at least one month | SCZ=119, CTL=109                | 110, including 16 FFAs, 25 phosphatidylcholines, 23 lysophosphatidylcholines, 11 phosphatidylcholine plasmalogens, 7 phosphatidylethanolamines, 9 lysophosphatidylethanolamines, 6 phosphatidylethanolamine plasmalogens, and 13 sphingomyelins | SFA increased: 14:0, 16:0, 17:0, 20:0, PUFA increased: 16:1, 17:1, 20:1, 20:2, 22:1, 22:2, 22:4, 24:1<br>LPC: 4 increased 19 decreased<br>PC: 14 types decreased 11 types increased<br>PC-O decreased<br>LPE 3 decreased 9 increased<br>PE 2 decreased 5 increased<br>PC-P decreased<br>SM: 6 increased, 7 decreased. Elevated SMs were associated with increased breakdown of PCs, SMs with unsaturated fatty acid residues (C18:1 and C24:1) were higher, most SMs containing saturated fatty acid residues (C16:0, C20:0, and C24:0) were lower<br>Increased SMs were associated with increasing breakdown of PCs |
|       |              |     |                                                                                                                                                                                |                                 |                                                                                                                                                                                                                                                 |                                                                                                                                                                                                                                                                                                                                                                                                                                                                                                                                                                                                                      |
| [81]  | Zhou 2020    | SCZ | drug-naïve                                                                                                                                                                     | first-episode<br>SCZ=40, CTL=52 | PUFAs, SFAs                                                                                                                                                                                                                                     | Significant reductions of 16:0, 18:1n9c 18:2n6c, and 20:4n6 20:4n6 22:6n3 levels in SCZ compared to CTL. Disrupted metabolism of fatty acids especially in saturated and n-6 fatty acid families were observed by comparing correlations between precursor and product fatty acid levels within each fatty acid family.                                                                                                                                                                                                                                                                                              |
| [80]  | Yang 2017    | SCZ | Medicated                                                                                                                                                                      | SCZ=110, CTL=109                | PUFAs                                                                                                                                                                                                                                           | Monounsaturated fatty acids and ω-6 PUFAs were significantly increased in SCZs compared with CTL. Desaturation from saturated fatty acids to Monounsaturated fatty acids and β-oxidation were enhanced, as estimated by the ratios of products to precursors.                                                                                                                                                                                                                                                                                                                                                        |
| [112] | Tkachev 2021 | SCZ | Medicated                                                                                                                                                                      | SCZ=82, CTL=138                 | Cer                                                                                                                                                                                                                                             | Cer (d18: 1/16: 0), Cer (d18: 1/18: 0) и Cer (d18: 1/24: 1). Among these compounds, Cer (d18: 1/18: 0) showed the strongest largest difference between patients and controls.                                                                                                                                                                                                                                                                                                                                                                                                                                        |

|       |                    |          |                             |                                                                                                                          |                               |                                                                                                                                                                                                                                           |
|-------|--------------------|----------|-----------------------------|--------------------------------------------------------------------------------------------------------------------------|-------------------------------|-------------------------------------------------------------------------------------------------------------------------------------------------------------------------------------------------------------------------------------------|
| [118] | Hurşitoğlu 2021    | SCZ      | Medicated                   | SCZ=30, CTL=30                                                                                                           | malondialdehyde               | Significantly increased. No significant correlation was found ( $p>0.05$ ) between malondialdehyde, superoxide dismutase and catalase activity and PANSS scores or the chlorpromazine equivalent and clinical characteristics.            |
| [119] | Güneş 2016         | SCZ      | Medicated                   | SCZ=41, CTL=43 (11 taking typical antipsychotics, 19 taking atypical antipsychotics, 11 taking combined antipsychotics). | malondialdehyde               | Significantly increased, depend on treatment                                                                                                                                                                                              |
| [120] | Uddin 2021         | SCZ      | Medicated                   | SCZ=63, CTL=63                                                                                                           | malondialdehyde               | Increased                                                                                                                                                                                                                                 |
| [51]  | Wei 2022           | SCZ      | Medicated                   | SCZ=13329, CTL=5810                                                                                                      | TG, TC, VLDL, VDL,LDL, APOB   | TG were higher in SCZ and BPD groups, and levels of cholesterol, HDL, LDL, and ApoB were lower in SCZ and BPD groups.                                                                                                                     |
| [34]  | Wang 2022          | MDD, SCZ | Medicated                   | MDD = 35, SCZ = 31, CTL=32                                                                                               | TG, PI, PC, Cer, lipoproteins | PI(16:1) decreased in the MDD group. TG(18:3/18:2/18:3), PC(8:0e/6:0), CerG2GNAc1(d38:4), LDL increased in MDD.                                                                                                                           |
| [113] | Gracia-Garcia 2011 | MDD      | Medicated                   | MDD=23, CTL=23                                                                                                           | Cer                           | Cer elevated in MDD compared to CTL                                                                                                                                                                                                       |
| [58]  | Liu 2016           | MDD      | medicated and non-medicated | MDD=60, CTL=59+ MDD=75 and CTL=52                                                                                        | LPC, LPE, PC, PE, PI, TG      | LPC, LPE, PC, PE, PI, TG increased with increase of symptom severity; PE-O decreased with increase of symptom severity (HAMD) SM 39:1, 2 significantly decreased in MDD subjects, while LPE 20:4, PC 34:1, PI 40:4, and TG 44:2 increased |
| [59]  | Liu 2015           | MDD      | medicated and non-medicated | MDD=60, CTL=59 for validation MDD=75 and CTL=52                                                                          | LPC, LPE, PC, PE, PI, TG, CAR | LPC 16:1 sn-1 16:1 sn-2, LPE 16:0 sn-1, 16:0 sn-2 18:1 sn-2 22:5 sn-1 16:1 sn-1, PC 32:1, PE 34:2 36:4, TG increased in MDD compared to CTL; PC-O 36:2, PE-O 34:3 36:5 38:7 36:2, 5 types of CAR decreased in MDD compared to CTL         |
| [63]  | Demirkan 2013      | MDD      | Medicated                   | samples=742, family study                                                                                                | SM, PC                        | SM and PC-O significantly associated with symptom severity (HADS-D)                                                                                                                                                                       |

|       |            |                                        |                                  |                                          |                                                                                                                                                                                                                                        |                                                                                                                                                                                                                                                                                                                                                                                |
|-------|------------|----------------------------------------|----------------------------------|------------------------------------------|----------------------------------------------------------------------------------------------------------------------------------------------------------------------------------------------------------------------------------------|--------------------------------------------------------------------------------------------------------------------------------------------------------------------------------------------------------------------------------------------------------------------------------------------------------------------------------------------------------------------------------|
| [60]  | Kim 2018   | MDD                                    | recently non-medicated (8 weeks) | MDD=20, CTL=10 + 25*3 validation         | TG, DG, PS, PI, CE                                                                                                                                                                                                                     | TG mostly decreased in MDD compared to CTL;<br>DG not changed, CE increased, PI decreased.<br>Results not reproduced in validation, study not used for comparison                                                                                                                                                                                                              |
| [111] | Cai 2019   | MDD                                    | Drug naïve                       | MDD=30, CTL=30                           | PE, LPC                                                                                                                                                                                                                                | LysoPC (16:0) LysoPC (18:0) increased<br>PE (16:0/22:6) PE (18:0/22:6) decreased in MDD compared to CTL.                                                                                                                                                                                                                                                                       |
| [61]  | Zhang 2022 | MDD, BPD                               | Medicated                        | MDD = 28, BDD = 22, CTL=25               | different lipids                                                                                                                                                                                                                       | Levels of MGDG, phSM, CerG2GNAc1, AcCa and PS were decreased while GM2 and PIP were increased in MDD when compared with CTL. Levels of MGDG, CoQ10, SM, phSM, AcCa, PS, and PE were decreased while GD2, GM2, TG, LPE, PIP, and PIP2 were increased in BPD when compared with CTL. Levels of LPE and LPI were decreased while PE were increased in MDD when compared with BPD. |
| [79]  | Tao 2022   | MDD, BPD, SCZ transdiagnostic subtypes | medicated and non-medicated      | MDD = 105, BPD = 132, SCZ = 112, CTL=198 | 9,12-Octadecadienal, 10-nitro-9Z,12Z-octadecadienoic acid, Cyclopentaneoctanoic acid, Hexadecandioic acid,12-Tridecynoic acid,Caprylic acid, 20-oxo-22,23,24,25,26,27-hexanorvitamin D3, 4-amino-3-methylbutanoic acid, DGTS 16:0/18:1 | The 10 identified lipids could help identify homogeneous transdiagnostic subtypes across psychiatric disorders.                                                                                                                                                                                                                                                                |
| [82]  | Zhou 2019  | MDD From 6 to 18 years                 | 52 drug naive, 32 with treatment | MDD=84 CNL=50                            | PUFAs, SFA, PC, PE                                                                                                                                                                                                                     | alpha-Linolenic acid, Arachidonic Acid, cis-9-Palmitoleic acid, Eicosapentaenoic acid, Linoleic acid, Oleic acid, decreased. Azelaic acid increased, Palmitic acid Dodecanoic acid,Capric acid (SFA) decreased<br>PC(10:0/14:1), PC(12:0/22:5), PC(20:5/24:4) decreased                                                                                                        |

|       |                         |                       |            |                   |                                                                                                  |                                                                                                                                                                                                                                                                                                                                                                                                                                                                                                                                                                                                                                                                                                 |
|-------|-------------------------|-----------------------|------------|-------------------|--------------------------------------------------------------------------------------------------|-------------------------------------------------------------------------------------------------------------------------------------------------------------------------------------------------------------------------------------------------------------------------------------------------------------------------------------------------------------------------------------------------------------------------------------------------------------------------------------------------------------------------------------------------------------------------------------------------------------------------------------------------------------------------------------------------|
|       |                         |                       |            |                   |                                                                                                  | PC(13:0/22:2) PC(18:0/0:0) PC(18:1/0:0)<br>PC(18:2/24:4) PC(20:5/0:0) increased<br>PE(18:1/0:0) PE(18:2/0:0) increased                                                                                                                                                                                                                                                                                                                                                                                                                                                                                                                                                                          |
| [83]  | Assies 2010             | recurrent<br>MDD      | Medicated  | MDD=137<br>CNL=65 | PUFAs, SFA                                                                                       | Plasma fatty acids increased, membrane fatty acids mostly decreased. Plasma: Linolenic acid, Linoleic acid, Gamma-linolenic acid, Docosadienoic acid, Myristoleic acid, Palmitoleic acid, Vaccenic acid, Hypogeic acid, Oleic acid, Erucic acid, Nervonic acid. Sfa: Myristic acid, Palmitic acid, Arachidic acid, Behenic acid<br>Erythrocyte: Octadectetraenoic acid (increased), Docosapentaenoic acid, Docosahexaenoic acid, Gamma-linolenic acid(increased), Arachidonic acid, Docosatetraenoic acid Docosapentaenoic acid Docosadienoic acid Myristoleic acid Palmitoleic acid Hypogeic acid Nervonic acid.<br>SFA: Palmitic acid (increased) Arachidic acid Behenic acid Lignoceric acid |
| [62]  | Kuwano 2018             | MDD                   | Drug naïve | MDD=15<br>CNL=19  | TC, HDL-C, LDL-C, 62 plasma lipid species including LPC, LPE, PC, PE, cholesteryl ester (CE), TG | Plasma tryptophan-kynurenine metabolites and cholesteryl esters were significantly correlated in MDD group, but not in HC group. HDL-C correlated negatively with depressive symptoms.                                                                                                                                                                                                                                                                                                                                                                                                                                                                                                          |
| [103] | Sun 2022                | MDD                   | Drug naïve | MDD=31<br>CNL=29  | bile acid                                                                                        | Increased 23-nordeoxycholic acid decreased tauroolithocholic acid, glycolithocholic acid, and lithocholic acid 3-sulfate in MDD compared to CTL                                                                                                                                                                                                                                                                                                                                                                                                                                                                                                                                                 |
| [74]  | MahmoudianDehkordi 2022 | MDD, Anxiety symptoms | Drug naïve | MDD=208           | bile acid                                                                                        | Chenodeoxycholic acid was significantly lower at baseline in both severely depressed and highly anxious participants compared to participants with less severe symptoms.<br>Lithocholic acid was higher in the more anxious participants.                                                                                                                                                                                                                                                                                                                                                                                                                                                       |

|       |                  |                                         |                                                                                     |                               |                  |                                                                                                                                            |
|-------|------------------|-----------------------------------------|-------------------------------------------------------------------------------------|-------------------------------|------------------|--------------------------------------------------------------------------------------------------------------------------------------------|
| [104] | Köhnke 2022      | MDD                                     | Medicated                                                                           | MDD=639<br>CNL=530            | Calcif           | lower 25(OH)D levels than CTL. Patients with atypical depression had the lowest levels. Symptom severity was inversely related to 25(OH)D. |
| [109] | Stirton 2021     | MDD                                     | Medicated                                                                           | MDD=48<br>CNL=9               | total OxPCs      | Increased compared to CTL                                                                                                                  |
| [117] | Maes 2009        | MDD                                     | Medicated                                                                           | MDD=35<br>CNL=22              | CoQ10            | CoQ10 was significantly lower in depressed patients compared to CTL. significantly lower in patients with treatment resistant.             |
| [124] | Islam 2018       | MDD                                     | Medicated                                                                           | MDD=247<br>CNL=248            | Malondialdehyde  | Malondialdehyde levels were higher in patients compared to CTL                                                                             |
| [122] | Alvarez-Mon 2022 | MDD                                     | Medicated                                                                           | MDD=30<br>CNL=20              | Malondialdehyde  | Malondialdehyde levels were higher in patients compared to CTL                                                                             |
| [125] | Uyar 2022        | MDD                                     | Different medication status                                                         | MDD=20<br>CNL=124             | Lipoproteins     | HDL levels were lower in the MDD patients who had never received treatment in comparison to those who had received treatment.              |
| [57]  | Pillai 2018      | Post-partum depression                  |                                                                                     | MDD=186<br>CNL=250            | Lipoproteins, TC | Low serum levels of TC and HDL-c were significantly low in postpartum depression women with severe depressive symptoms.                    |
| [96]  | Mamalakis 2006   | Depressive symptoms<br>In health people | No medication                                                                       | 150 males                     | CE               | There were no significant differences.                                                                                                     |
| [97]  | Beydoun 2015     | Depressive symptoms<br>In health people | baseline depressive symptoms as predictors for longitudinal change in lipid profile | Men: n=826 ;<br>Women: n=1099 | TC               | A higher level TC was linked to faster increase in depressive symptom scores, only among women.                                            |
| [102] | Cenik 2017       | Depressive symptoms<br>In health people | No medication                                                                       | 3117 adults                   | sterols          | Increased 7-Dehydrocholesterol, decreased desmosterol, 14-desmethyl lanosterol in people with depressive symptoms                          |
| [78]  | Casseb 2019      | Depressive symptoms and                 | No medication                                                                       | 36 adults                     | Calcifediol      | No association with depressive and anxiety symptoms                                                                                        |



|       |                        |                                           |                                 |                                                                  |                                                    |                                                                                                                                                                                                                                         |
|-------|------------------------|-------------------------------------------|---------------------------------|------------------------------------------------------------------|----------------------------------------------------|-----------------------------------------------------------------------------------------------------------------------------------------------------------------------------------------------------------------------------------------|
|       |                        | anxiety symp-<br>toms In health<br>people |                                 |                                                                  |                                                    |                                                                                                                                                                                                                                         |
| [87]  | McNamara 2015          | BPD                                       | Medicated                       | BD=40, CTL=40                                                    | PUFAs                                              | Docosahexaenoic acid (DHA, 22:6 <i>n</i> -3),<br>EPA+DHA (Omega-3 Index)<br>decreased in erythrocyte membrane                                                                                                                           |
| [86]  | Sobczak 2004           | BPD                                       | Drug naïve                      | First-degree rela-<br>tives of patients<br>with BD=30,<br>CTL=15 | PUFAs                                              | Increased ratio of omega-6/omega-3 fatty acids<br>in serum                                                                                                                                                                              |
| [99]  | Huang 2018             | BPD                                       | medicated                       | manic BD=32,<br>CTL=64                                           | TG, TC                                             | TG increased in serum, TC decreased                                                                                                                                                                                                     |
| [105] | Boerman 2016           | BPD                                       | medicated                       | BD=118                                                           | Calcifediol                                        | Calcifediol decreased in blood                                                                                                                                                                                                          |
| [98]  | Ribeiro 2017           | BPD                                       | medicated                       | BD=14, CTL=21                                                    | sphingolipids<br>glycerophospholipids              | Sphingolipids, phosphoinositols increased in<br>serum                                                                                                                                                                                   |
| [115] | Brunkhorst-Kanaan 2021 | BPD                                       | medicated                       | BD=6, CTL=98                                                     | Cer                                                | Cer22:0 increased in plasma                                                                                                                                                                                                             |
| [51]  | Wei 2022               | BPD                                       | medicated                       | BD=4061,<br>CTL=5810                                             | TG, TC                                             | TG increased, TC decreased in blood                                                                                                                                                                                                     |
| [110] | Costa 2019             | BPD,<br>SCZ                               | Drug naïve                      | BPD=27, SCZ =28,<br>CTL=30                                       | LPC, PC, SM, Cer, LPE, PE, TG,<br>PI, LPS, PS, CAR | LPC, PC increased in BPD and<br>SCZ vs. CTL                                                                                                                                                                                             |
| [123] | Aydemir 2014           | BPD                                       | medicated                       | BPD=51, CTL=50                                                   | malondialdehyde                                    | malondialdehyde higher in BPD compared to<br>CTL                                                                                                                                                                                        |
| [114] | Brunkhorst-Kanaan 2019 | BPD, MDD                                  | medicated                       | BPD=32, CTL=405                                                  | Cer, HexCer, DG                                    | Cer and HexCer elevated in BPD compared to<br>CTL, DG increased                                                                                                                                                                         |
| [84]  | Scola 2018             | BPD, MDD                                  | medicated                       | BPD=87, MDD=34,<br>CTL=31                                        | PUFAs                                              | higher levels AA: EPA and AA: EPA+DHA in<br>patients with BPD. Omega-6 present a positive<br>correlation with illness duration in patients<br>with BPD and AA: EPA ratio positively associ-<br>ated with illness duration in MDD group. |
| [89]  | Saunders 2015          | BPD                                       | medicated and non-<br>medicated | BPD=27, CTL=31                                                   | PUFAs                                              | Eicosapentaenoic acid decreased in BPD vs CTL                                                                                                                                                                                           |
| [85]  | Pomponi 2013           | BPD                                       | medicated                       | BPD=42, CTL=57                                                   | PUFAs                                              | Increased Linoleic acid Arachidonic acid $\alpha$ -Lin-<br>olenic acid EPA, decreased DHA                                                                                                                                               |

|       |                  |                                             |                                                                       |                                                                           |                                                                                     |                                                                                                                                                                      |
|-------|------------------|---------------------------------------------|-----------------------------------------------------------------------|---------------------------------------------------------------------------|-------------------------------------------------------------------------------------|----------------------------------------------------------------------------------------------------------------------------------------------------------------------|
| [90]  | Mongan 2021      | GAD                                         | unknown                                                               | GAD=386<br>CTL=3571                                                       | PUFAs                                                                               | Positive association of n-6:n-3 ration with GAD at age 24                                                                                                            |
| [67]  | De Berardis 2015 | GAD                                         | drug-naïve                                                            | GAD=70                                                                    | HDL-C, LDL-C, total cholesterol (TC), TG, VLDL-C, TC/HDL-C ratio, LDL-C/HDL-C ratio | Alexithymic patients (44,3%) showed higher TG, VLDL-C, LDL-C, LDL-C/HDL-C, TC/HDL-C ratio and lower TC and HDL-C                                                     |
| [101] | Lacerda 2000     | GAD                                         | free of medication                                                    | GAD=23<br>PD (panic disorder)=41<br>MDD=21                                | TC                                                                                  | No significant differences in cholesterol level between GAD, PD and MDD                                                                                              |
| [100] | Peter 2002       | GAD                                         | medicated                                                             | GAD=60<br>OCD=60<br>CTL=60                                                | TC                                                                                  | Patients with GAD and OCB have elevated cholesterol level compared to CTL                                                                                            |
| [68]  | Sevincok 2001    | GAD, MDD, Comorbid GAD and MDD              | Drug-free for at least 1 month                                        | GAD-MD=40<br>MDD=27<br>GAD=26<br>CTL=24                                   | TC, TG, HDL-C, LDL-C                                                                | Comorbid MDD and GAD is characterized by higher total cholesterol, TG, higher LDL-C and lower LDL-C                                                                  |
| [69]  | Wang 2016        | Depression with anxiety                     | free of medication or recently non-medicated (2 month)                | Depression with anxiety=29<br>Depression without anxiety=31               | TC, TG, HDL-C, LDL=C, lipoprotein A                                                 | TG levels statistically higher in depression with anxiety group. Negative correlation between HDL levels and anxiety score                                           |
| [127] | Veen 2009        | MDD and/or AD                               | Recently non-medicated with exception of a low dose of benzodiazepine | Patents with depression and/or anxiety disorder=72<br>CTL=42              | TC, TG, LDL, HDL                                                                    | Elevated basal cortisol concentration were independently associated with a less favorable lipoprotein profile in patients. Patients showed lower HDL compared to CTL |
| [93]  | Jadoon 2012      | Anxiety symptoms in older patients with MDD | medicated                                                             | N=132                                                                     | PUFAs                                                                               | Erythrocyte membrane linoleic acid levels had a curvilinear association with anxiety symptoms                                                                        |
| [72]  | Thesing 2018     | AD                                          | medicated                                                             | Current pure depressive disorder=304<br>Current pure anxiety disorder=548 | PUFAs                                                                               | Comorbid depressive and anxiety disorder patients had lower N-3 PUFA and lower N3:FA ratio                                                                           |

|       |                   |                                      |               |                                                                                                                   |                                                                                            |                                                                                                                         |
|-------|-------------------|--------------------------------------|---------------|-------------------------------------------------------------------------------------------------------------------|--------------------------------------------------------------------------------------------|-------------------------------------------------------------------------------------------------------------------------|
|       |                   |                                      |               | Current comorbid anxiety and depression disorder=529<br>Remitted anxiety/depressive disorder=897<br>HC=634        |                                                                                            |                                                                                                                         |
| [63]  | Demirkan 2013     | Anxiety symptoms                     | medicated     | Population study (Dutch-family) N=742                                                                             | 148 different lipids (phospho- and sphingolipids)                                          | The inverse correlation between PC O 36:4, SPM 23:1 and anxiety symptoms                                                |
| [128] | Huang 2003        | Anxious state                        | unknown       | Anxious state=20<br>Depression state=103<br>CTL=39                                                                | TC, TG, HDL-C, VLDL, LDL-C, TC/HDL ratio, HDL/LDL ratio                                    | Significant differences in HDL and TC/HDL among patients with anxious state, depression state and CTL in men            |
| [73]  | Verly-Miguel 2015 | AD during pregnancy                  | drug-naïve    | Cross-sectional study<br>N=228 pregnant women                                                                     | PUFAs                                                                                      | Serum concentration of DHA was inversely associated with the occurrence of anxiety disorder during early pregnancy      |
| [76]  | Huang 2014        | Anxiety symptoms                     | Not medicated | Population study: 498 pregnant women with anxiety symptoms measured by Stress Scales 21-item Short Form (DASS-21) | Calcifediol                                                                                | A 1 ng/mL lower calcifediol was associated with 0.043 higher DASS-21 Anxiety Scores                                     |
| [77]  | Chen 2020         | Anxiety symptoms                     | Not medicated | Population study: 327 young adults                                                                                | Calcifediol                                                                                | higher serum calcifediol concentrations were significantly related to lower scores on the State-Trait Anxiety Inventory |
| [65]  | Dong 2021         | AD associated with Parkinson disease | unknown       | PDA (with anxiety)=35<br>PDNA (no anxiety)=35                                                                     | TC, TG, HDL-C, LDL-C, Apo-A1, Apo-B, lipoprotein a, metabolomics study of different lipids | PDA patients showed lower levels of TC, TG, LDL-C, apolipoprotein B compared to the healthy control and PDNA patients.  |

|       |                |                          |               |                                                                                                                   |                                                            |                                                                                                                                                                                                                                                                                                                                                                                                                                                                                                                                                                                                                    |
|-------|----------------|--------------------------|---------------|-------------------------------------------------------------------------------------------------------------------|------------------------------------------------------------|--------------------------------------------------------------------------------------------------------------------------------------------------------------------------------------------------------------------------------------------------------------------------------------------------------------------------------------------------------------------------------------------------------------------------------------------------------------------------------------------------------------------------------------------------------------------------------------------------------------------|
|       |                |                          |               | HC=35                                                                                                             |                                                            | 14 types of lipids determined by metabolome analysis were decreased in PDA group compared to PDNA and HC: 1 sterol lipid (11-acetoxy-3 $\beta$ ,6 $\alpha$ -dihydroxy-9,11-seco-5 $\alpha$ -cholest-7-en-9-one), 6 glycerolipids (DG(13:0/18:2(9Z,12Z)/0:0)[iso2], DG(14:0/18:1(11Z)/0:0), DG(15:0/18:1(11Z)/0:0), DG(15:0/16:1(9Z)/0:0)), (DG(14:0/18:2(9Z,12Z)/0:0), DG(15:0/18:2(9Z,12Z)/0:0), 5 fatty acyls (Hexacosanoic acid, 15-tetracosenal, 2R-HpOTrE, 13-OxoODE, 10-oxo-nonadecanoic acid), 1 sphingolipid (N-(hexadecanoyl)-deoxysphing-4-enine-1-sulfonate), 1 prenol lipid (7,8-Didehydroastaxanthin) |
| [71]  | Pistorio 2011  | Anxiety disorder         | medicated     | AD group=28<br>Depression group=39<br>Anxious-depressive disorder group=13<br>Eating disorders group=15<br>CTL=60 | TC, TG and apoA and B                                      | Lower level of cholesterol in the Anxious-depressive disorder group compared to other groups. Higher triglycerides level in AD group and anxious-depressive disorder group compared to other groups. Higher level of Apolipoprotein A in the anxious-depressive group, and higher level of Apolipoprotein B in the AD group compared to other groups                                                                                                                                                                                                                                                               |
| [126] | Lieberman 2012 | Tension-Anxiety symptoms | Not medicated | Female volunteers from recruits at the USMC training facility, n=35                                               | FFA, LDL, HDL, TG, dehydroepiandrosterone-sulfate (DHEA-S) | Increases HDL, FFA, DHEA-S were associated with tension-anxiety. LDL was negatively correlated with tension-anxiety                                                                                                                                                                                                                                                                                                                                                                                                                                                                                                |
| [66]  | Kui 2022       | Anxiety disorder         | medicated     | AD=18<br>CTL=31                                                                                                   | Metabolomics study                                         | Higher level of 3-Hydroxysebacic acid, LysoPE(18:2(9Z,12Z)/0:0) in AD group compared to CTL,<br>Lower level of Propionylcarnitine, LysoPC(0:0/16:0), 2-Hydroxy-3-methylpentanoic acid in AD group compared to CTL                                                                                                                                                                                                                                                                                                                                                                                                  |

|       |            |                                 |               |                                                                                                   |                 |                                                                                                                           |
|-------|------------|---------------------------------|---------------|---------------------------------------------------------------------------------------------------|-----------------|---------------------------------------------------------------------------------------------------------------------------|
| [70]  | Hu 2018    | Anxiety symptoms                | Not medicated | 1754 participants, who completed the STAI-T                                                       | TG, HDL         | higher STAI-T scores were associated with higher triglyceride levels                                                      |
| [75]  | Xing 2016  | Anxiety symptoms in PD patients | unknown       | PD patients with cognitive impairment=38<br>PD patients with no cognitive impairment=40<br>CTL=40 | Cer             | Cer C 20:0 was positively associated with anxiety symptoms in patients with Parkinson disease and cognitive impairment    |
| [124] | Islam 2013 | GAD                             | medicated     | GAD=50<br>CTL=51                                                                                  | Malondialdehyde | Serum malondialdehyde content was significantly higher in GAD patients compared to the controls                           |
| [64]  | Liu 2018   | Post-stroke anxiety             | medicated     | Anxiety group=49<br>Non-anxiety group=154                                                         | Malondialdehyde | Malondialdehyde level was increased in patients with post-stroke anxiety compared to post-stroke patients without anxiety |
